# Supplementary material for: Stage-Specific COPII-Mediated Cargo Selectivity in African Trypanosomes
Source: PubMed Central journal article supplement (PMC9429938; doi:10.1128/msphere.00188-22), 2022-06-21

**A. TbSec23.1**

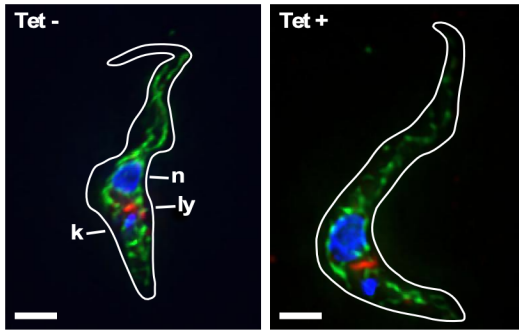

**C. TbSec24.1**

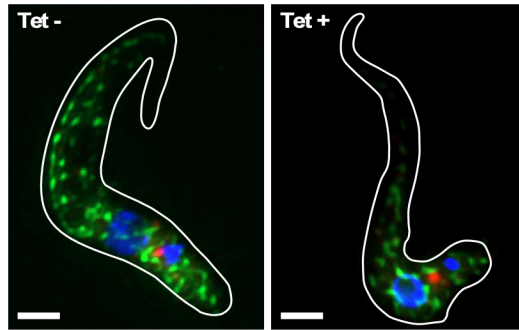

**B. TbSec23.2**

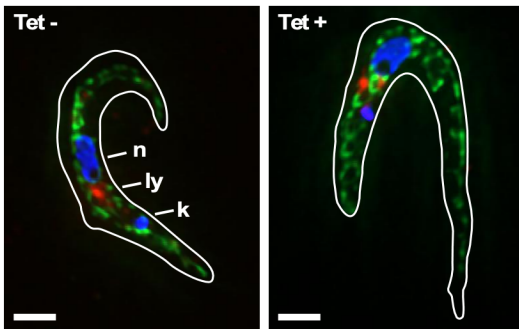

**D. TbSec24.2**

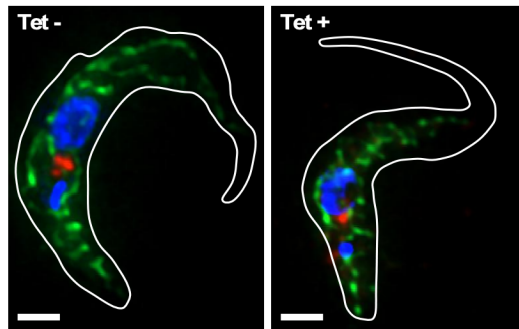

Supplement: msphere.00188-22-s0002.pdf [file msphere.00188-22-s0002.pdf]
