# Supplementary material for: Stage-Specific COPII-Mediated Cargo Selectivity in African Trypanosomes
Source: PubMed Central journal article supplement (PMC9429938; doi:10.1128/msphere.00188-22), 2022-06-21

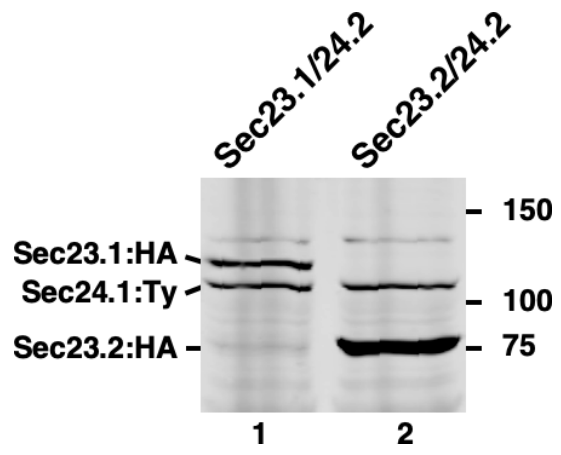

Supplement: msphere.00188-22-s0003.pdf [file msphere.00188-22-s0003.pdf]
