# Supplementary material for: Stage-Specific COPII-Mediated Cargo Selectivity in African Trypanosomes
Source: PubMed Central journal article supplement (PMC9429938; doi:10.1128/msphere.00188-22), 2022-06-21

A. TbSec23.2

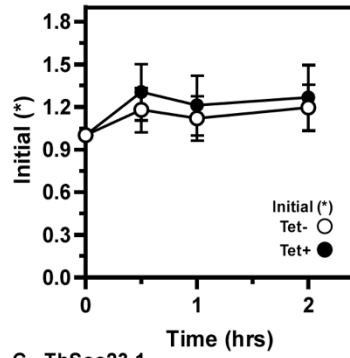

B. TbSec23.1

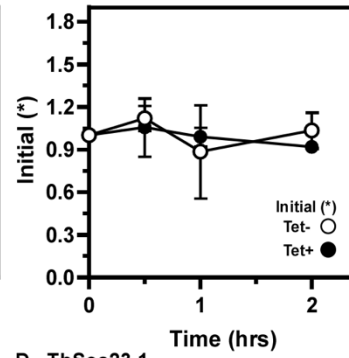

C. TbSec23.1

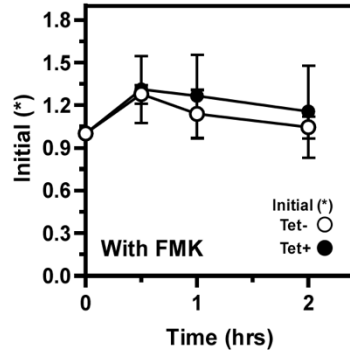

D. TbSec23.1

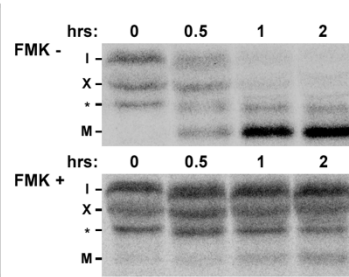

Supplement: msphere.00188-22-s0006.pdf [file msphere.00188-22-s0006.pdf]
